# Supplementary material
Source: PubMed Central journal article supplement (PMC3322234)
Supplement: mmc1.pdf [file mmc1.pdf]

**The American Journal of Human Genetics, Volume 90  
Supplemental Data**

**On Sharing Quantitative Trait GWAS Results in an Era of  
Multiple-omics Data and the Limits of Genomic Privacy**

**Hae Kyung Im, Eric R Gamazon, Dan L. Nicolae, and Nancy J. Cox**

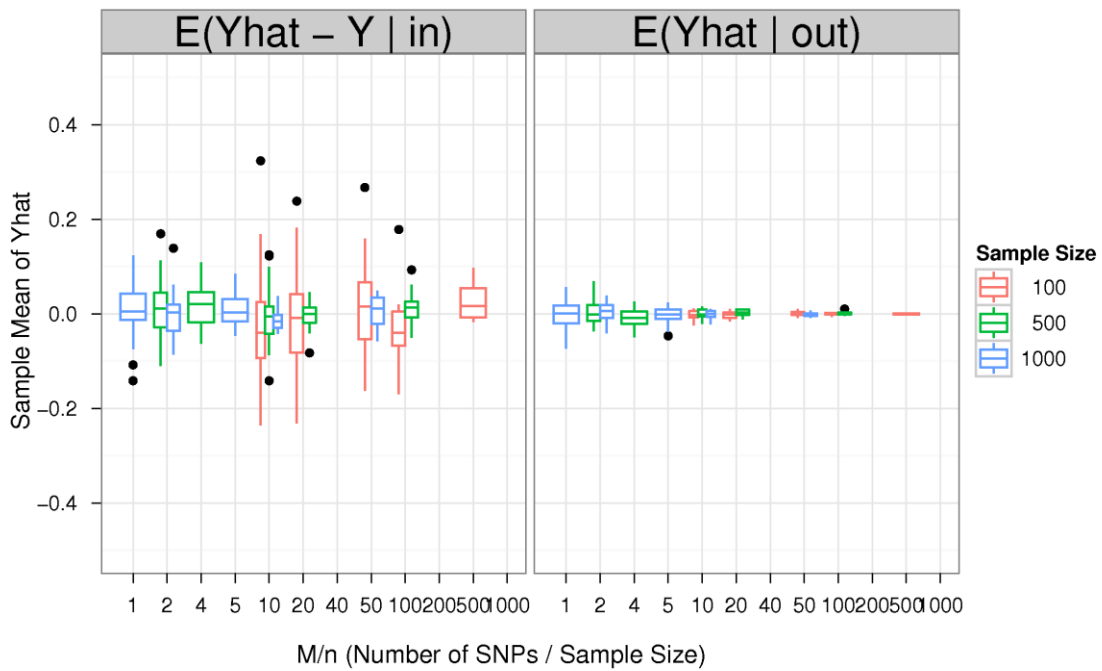

**Figure S1. Simulated Sample Mean of  $\hat{Y}$  by Membership Status**

This figure shows simulation results for twelve combinations of sample size and number of SNPs. Each simulation consisted of  $n$  test sample individuals ( $n = 100, 500, 1000$ ) used to estimate regression coefficients and 1000 individuals as reference. For all simulations  $\mu = 0$  and  $\sigma = 1$ . The left panel shows the average of  $\hat{Y} - Y$  over all individuals in the test sample. Each box plot represents up to 50 independent simulations for given  $n$  and  $M$ . The right panel shows the average of  $\hat{Y}$  over all individuals in the reference sample. The box plots lie around zero consistent with what we would expect from the mean estimated in eq. 1.

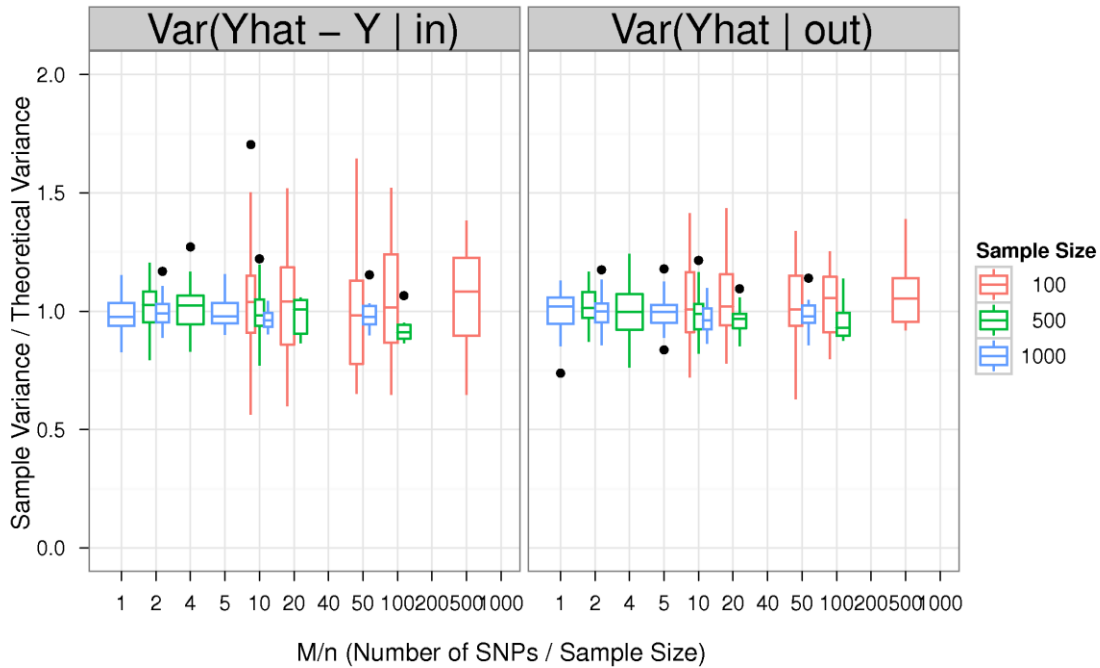

**Figure S2. Sample Variance of  $\hat{Y}$  by Membership Status**

For twelve combinations of sample size and number of SNPs we simulated genotypes and phenotypes. Each simulation consisted of  $n$  test sample individuals (100, 500, 1000) used to estimate regression coefficients and 1000 individuals as reference. This figure shows the sample variance of  $\hat{Y} - Y$  (divided by the theoretical value) for individuals in the study and the sample variance of  $\hat{Y}$  (divided by the theoretical value) for reference individuals. The box-plots lie around 1 consistent with our calculations. Each box corresponds to an independent simulation. This figure shows simulation results for twelve combinations of sample size and number of SNPs. Each simulation consisted of  $n$  test sample individuals (100, 500, 1000) used to estimate regression coefficients and 1000 individuals as reference. For all simulations  $\mu = 0$  and  $\sigma = 1$ . The left panel shows the sample variance of  $\hat{Y} - Y$  (divided by the theoretical value) over all individuals in the test sample. The right panel shows the sample variance of  $\hat{Y}$  (divided by the theoretical value) over all reference individuals. The box plots lie around 1 consistent with our calculations in equation 1.
